# Supplementary material for: Adiposity may confound the association between vitamin D and disease risk – a lifecourse Mendelian randomization study
Source: eLife. 2022 Aug 8;11:e79798. doi: 10.7554/eLife.79798 (PMC9359699; doi:10.7554/eLife.79798)
Supplement: Supplementary file 1. — Table 1 includes univariable Mendelian randomization estimates between lifecourse adiposity and vitamin D levels, Table 2 includes multivariable Mendelian randomization estimates between lifecourse adiposity and vitamin D levels, and Table 3 includes repeated analyses using vitamin D estimates from the study by Revez et al. [file elife-79798-supp1.xlsx]

## Sheet: S1 Table
Supplementary Table 1: Univariable Mendelian randomization analysis
25 hydroxyvitamin D levels estimated using findings by Manousaki et al (2020), Method - Mendelian randomization (MR) method, nSNPs - number of genetic variants, Beta - MR effect estimate, SE - corresponding standard error, P - corresponding p-value
Exposure	Outcome	Method	nSNPs	Beta	SE	P
Childhood body size	25 hydroxyvitamin D level	Inverse variance weighted	253	-0.0645764	0.0175871	0.000240835
Childhood body size	25 hydroxyvitamin D level	Weighted median	253	-0.0700874	0.0206451	0.000686623
Childhood body size	25 hydroxyvitamin D level	MR Egger	253	-0.0743774	0.0380042	0.0514459
Adult body size	25 hydroxyvitamin D level	Inverse variance weighted	488	-0.143851	0.0146493	9.26658e-23
Adult body size	25 hydroxyvitamin D level	Weighted median	488	-0.151632	0.0157941	7.94968e-22
Adult body size	25 hydroxyvitamin D level	MR Egger	488	-0.145312	0.0416995	0.000537207

## Sheet: S2 Table
Supplementary Table 2; Multivariable Mendelian randomization analysis
25 hydroxyvitamin D levels (childhood) estimated using data from the ALSPAC cohort, 25 hydroxyvitamin D levels (adult) estimated using findings by Manousaki et al (2020), Method - Mendelian randomization (MR) method, Beta - MR effect estimate, SE - corresponding standard error, P - corresponding p-value
		Univariable MR			Multivariable MR
Exposure	Outcome	Beta	SE	P	Beta	SE	P
Childhood body size	25 hydroxyvitamin D level (childhood)	-0.298382	0.106662	0.00517656	-0.321305	0.113023	0.00449547
Adult body size	26 hydroxyvitamin D level (childhood)	-0.0318965	0.0924114	0.729995	0.0600244	0.0978237	0.539518
		Univariable MR			Multivariable MR
Exposure	Outcome	Beta	SE	P	Beta	SE	P
Childhood body size	25 hydroxyvitamin D level (adult)	-0.0645764	0.0175871	0.000240835	0.0384843	0.0232758	0.0982481
Adult body size	26 hydroxyvitamin D level (adult)	-0.143851	0.0146493	9.26658e-23	-0.168125	0.0200255	4.63679e-17

## Sheet: S3 Table
Supplementary Table 3: Analyses repeated using vitamin D levels derived by Revez et al
25 hydroxyvitamin D levels estimated using findings by Revez et al (2020), Method - Mendelian randomization (MR) method, nSNPs - number of genetic variants, Beta - MR effect estimate, SE - corresponding standard error, P - corresponding p-value
Univariable Mendelian randomization
Exposure	Outcome	Method	nSNPs	Beta	SE	P
Childhood body size	25 hydroxyvitamin D level	Inverse variance weighted	280	-0.0695644	0.0172656	5.59975e-05
Childhood body size	25 hydroxyvitamin D level	Weighted median	280	-0.0882656	0.0199661	9.83479e-06
Childhood body size	25 hydroxyvitamin D level	MR Egger	280	-0.115123	0.0381209	0.00276324
Adult body size	25 hydroxyvitamin D level	Inverse variance weighted	500	-0.182257	0.0154921	5.94566e-32
Adult body size	25 hydroxyvitamin D level	Weighted median	500	-0.183281	0.0152392	2.56429e-33
Adult body size	25 hydroxyvitamin D level	MR Egger	500	-0.176341	0.0437128	6.34276e-05
Multivariable Mendelian randomization
		Univariable MR			Multivariable MR
Exposure	Outcome	Beta	SE	P	Beta	SE	P
Childhood body size	25 hydroxyvitamin D level (adult)	-0.115123	0.0381209	0.00276324	0.0650435	0.0238468	0.0063806
Adult body size	25 hydroxyvitamin D level (adult)	-0.182257	0.0154921	5.94566e-32	-0.223729	0.0209464	1.24945e-26
